# Supplementary material
Source: MDPI journal article supplement (https://www.mdpi.com/2073-445X/12/4/794)
Supplement: s1 [file s1]

## Supplementary Materials

**Table S1.** Agro-ecological risk of land index and decomposition by region in the HRB, 1995–2020.

| Region           | Risk Index ( <i>Tfpch</i> )                      |                                        |       |                                                |       |
|------------------|--------------------------------------------------|----------------------------------------|-------|------------------------------------------------|-------|
|                  | Technical efficiency index ( <i>Effch</i> )      |                                        |       | Technological progress index ( <i>Techch</i> ) |       |
|                  | Pure technology efficiency index ( <i>Pech</i> ) | Scale efficiency index ( <i>Sech</i> ) |       |                                                |       |
| Ejina Banner     | 1.000                                            | 0.971                                  | 0.971 | 0.876                                          | 0.851 |
| Jinta County     | 1.000                                            | 1.000                                  | 1.000 | 0.988                                          | 0.988 |
| Suzhou District  | 0.990                                            | 0.975                                  | 0.965 | 1.028                                          | 0.992 |
| Jiayuguan City   | 1.000                                            | 1.000                                  | 1.000 | 1.038                                          | 1.038 |
| Gaotai County    | 0.980                                            | 1.025                                  | 1.005 | 0.891                                          | 0.896 |
| Sunan County     | 1.000                                            | 1.000                                  | 1.000 | 0.894                                          | 0.894 |
| Linze County     | 1.000                                            | 1.000                                  | 1.000 | 0.892                                          | 0.892 |
| Ganzhou District | 1.000                                            | 1.000                                  | 1.000 | 0.959                                          | 0.959 |
| Shandan County   | 1.002                                            | 1.057                                  | 1.059 | 0.947                                          | 1.002 |
| Minle County     | 1.000                                            | 1.040                                  | 1.040 | 0.982                                          | 1.021 |
| Qilian County    | 1.000                                            | 1.000                                  | 1.000 | 0.815                                          | 0.815 |
| Mean value       | 0.997                                            | 1.006                                  | 1.003 | 0.935                                          | 0.938 |

**Table S2.** Matching coefficients agricultural of WLR in HRB from 1995 to 2020 (104m<sup>3</sup>/hm<sup>2</sup>)

| Region           | Time | 1995  | 2000  | 2005  | 2010  | 2015  | 2020  |
|------------------|------|-------|-------|-------|-------|-------|-------|
|                  |      |       |       |       |       |       |       |
| Ejina Banner     |      | 0.344 | 0.446 | 0.397 | 0.348 | 0.360 | 0.486 |
| Jinta County     |      | 0.569 | 0.653 | 0.720 | 0.623 | 0.458 | 0.474 |
| Suzhou District  |      | 0.846 | 0.808 | 0.770 | 0.722 | 0.630 | 0.600 |
| Jiayuguan City   |      | 0.870 | 0.942 | 0.878 | 0.804 | 0.652 | 0.554 |
| Gaotai County    |      | 0.755 | 0.663 | 0.509 | 0.476 | 0.473 | 0.432 |
| Sunan County     |      | 0.650 | 0.533 | 0.570 | 0.415 | 0.237 | 0.412 |
| Linze County     |      | 0.847 | 0.824 | 0.746 | 0.707 | 0.651 | 0.545 |
| Ganzhou District |      | 0.831 | 0.840 | 0.766 | 0.731 | 0.699 | 0.620 |
| Shandan County   |      | 0.803 | 0.789 | 0.734 | 0.768 | 0.503 | 0.563 |
| Minle County     |      | 0.771 | 0.792 | 0.749 | 0.711 | 0.576 | 0.524 |
| Qilian County    |      | 0.761 | 0.764 | 0.741 | 0.703 | 0.586 | 0.401 |
| HRB              |      | 0.769 | 0.735 | 0.673 | 0.647 | 0.559 | 0.527 |

**Table S3.** regression equation between matching coefficient of WLR and ecological risk of agricultural water resources.

| Variable           | Coefficient | Std. Error         | t-Statistic | Prob.    |
|--------------------|-------------|--------------------|-------------|----------|
| PPXS?              | 0.777446    | 0.382514           | 2.032464    | 0.0485   |
| POP?               | 0.012473    | 0.005439           | 2.293113    | 0.0269   |
| C                  | -0.171040   | 0.416966           | -0.410200   | 0.6837   |
| R-squared          | 0.208699    | Mean dependent var |             | 0.907343 |
| Adjusted R-squared | -0.017387   | S.D. dependent var |             | 0.265581 |
| S.E. of regression | 0.267880    | Sum squared resid  |             | 0.406507 |
| F-statistic        | 0.923096    | Durbin-Watson stat |             | 1.959130 |
| Prob(F-statistic)  | 0.533238    |                    |             |          |
